# Supplementary material for: Mechanism of oil molecules transportation in nano-sized shale channel: MD simulation
Source: Royal Society of Chemistry journal article supplement (doi:10.1039/c4ra16682e), 2015-01-01
Supplement: c4ra16682e1.pdf [file c4ra16682e1.pdf]

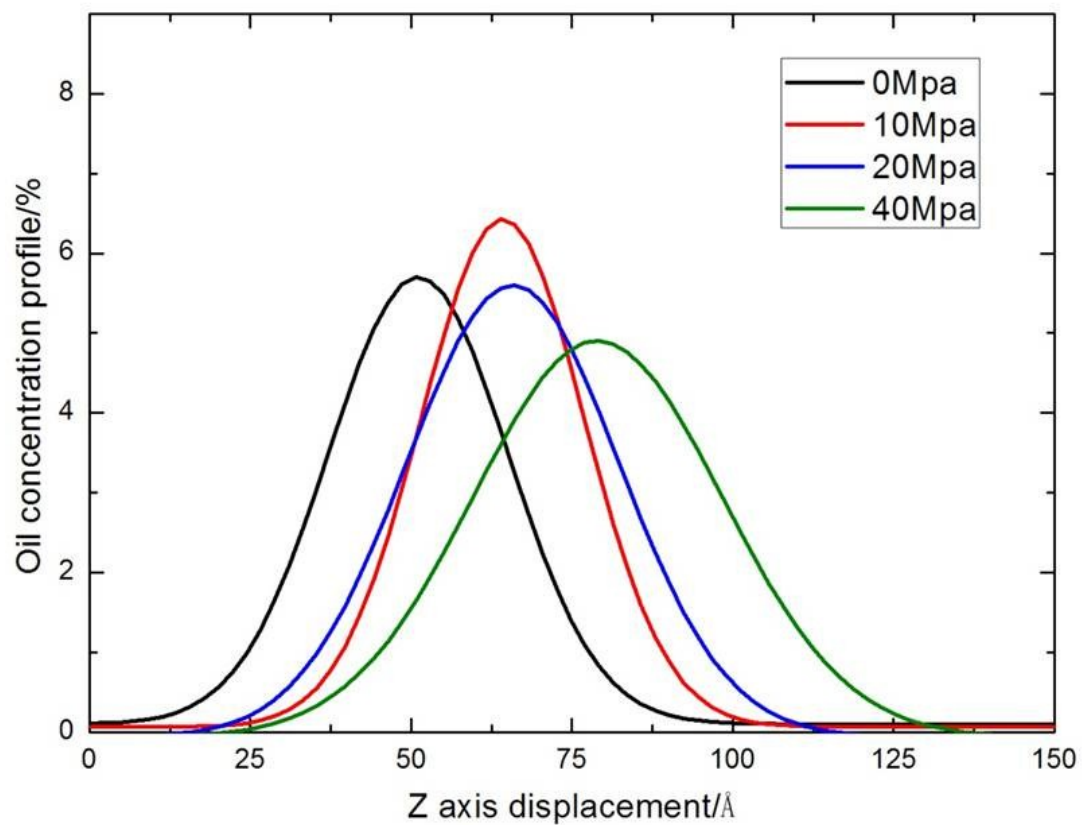

Figure s1. Oil concentration profile in final configuration of N<sub>2</sub> driving oil transport in shale channel with N<sub>2</sub> initial pressure of 0 Mpa, 10 Mpa, 20 Mpa and 40 Mpa.
